# Supplementary material
Source: PubMed Central journal article supplement (PMC4734574)
Supplement: supp_pp.15.01632_01632revSupplementalTbls.pdf [file supp_pp.15.01632_01632revSupplementalTbls.pdf]

**Supplemental Table 1.** *E. coli*, *Anabaena* strains and plasmids used in this study

| Strains/Plasmids               | Description                                                                                                                                                                                          | Source/Reference        |
|--------------------------------|------------------------------------------------------------------------------------------------------------------------------------------------------------------------------------------------------|-------------------------|
| <b><i>E. coli</i> strains</b>  |                                                                                                                                                                                                      |                         |
| JM109                          | <i>endA1 glnV44 thi-1 relA1 gyrA96 recA1 mcrB<sup>+</sup> Δ (lac-proAB) e14- [F' traD36 proAB<sup>+</sup> lacI<sup>q</sup> lacZΔM15] hsdR17 (r<sub>K</sub><sup>-</sup>m<sub>K</sub><sup>+</sup>)</i> | Lab collection          |
| BL21 (DE3) pLysS               | F <sup>-</sup> <i>ompT gal dcm lon hsdS<sub>B</sub>(r<sub>B</sub><sup>-</sup> m<sub>B</sub><sup>-</sup>) λ(DE3) pLysS(cm<sup>R</sup>)</i>                                                            | Novagen                 |
| HB 101                         | F <sup>-</sup> <i>mcrB mrr hsdS20 (r<sub>B</sub><sup>-</sup> m<sub>B</sub><sup>-</sup>) recA13 leuB6 ara-14 proA2 lacY1 galK2 xyl-5 mtl-1 rpsL20 (Sm<sup>R</sup>) glnV44 λ</i>                       | Lab collection          |
| HB101R2                        | Donor strain carrying pRL623(encoding methylase) and pRL443 (conjugal plasmid)                                                                                                                       | Lab collection          |
| <b><i>Anabaena</i> strains</b> |                                                                                                                                                                                                      |                         |
| <i>Anabaena</i> PCC 7120       | Wild-type strain                                                                                                                                                                                     | Lab collection          |
| <i>AnKatB<sup>+</sup></i>      | <i>Anabaena</i> PCC 7120 harbouring pAMKatB                                                                                                                                                          | This study              |
| <i>An3090Prom</i>              | <i>Anabaena</i> PCC 7120 harbouring pAM3090Prom                                                                                                                                                      | This study              |
| <i>AnKatB<sup>-</sup></i>      | Insertional inactivation of <i>katB</i> in <i>Anabaena</i> PCC 7120                                                                                                                                  | This study              |
| <b>Plasmids</b>                |                                                                                                                                                                                                      |                         |
| pET16b                         | amp <sup>R</sup> , expression vector                                                                                                                                                                 | Novagen                 |
| pAM1956                        | kan <sup>R</sup> , promoterless vector with <i>gfpmut2</i> reporter gene                                                                                                                             | Lab collection          |
| pFPN                           | amp <sup>R</sup> , kan <sup>R</sup> , integrative expression vector                                                                                                                                  | Chaurasia et al. (2008) |
| pRL271                         | cm <sup>R</sup> , kan <sup>R</sup> suicide vector for <i>Anabaena</i>                                                                                                                                | Lab collection          |
| pRL3090Kan                     | Internal 300 bp <i>katB</i> sequence along with <i>nptII</i> expression cassette (1.2 kb) cloned into <i>SacI</i> and <i>KpnI</i> sites of pRL271                                                    | This study              |
| pETKatB                        | 0.693 kb <i>alr3090</i> PCR product cloned into <i>NdeI</i> and <i>BamHI</i> sites of pET16b                                                                                                         | This study              |
| pFPNKatB                       | 0.693 kb <i>alr3090</i> fragment cloned in pFPN at <i>NdeI</i> - <i>BamHI</i> restriction sites                                                                                                      | This study              |
| pAMKatB                        | 1.3 kb <i>SmaI</i> - <i>SalI</i> fragment from pFPNKatB cloned in pAM1956 vector                                                                                                                     | This study              |
| pAM3090Prom                    | 300 bp <i>KpnI</i> - <i>SacI</i> fragment containing the <i>katB</i> promoter                                                                                                                        | This study              |

**Supplemental Table 2.** Primers used in this study

| <b>Name</b>       | <b>Sequence</b>                                               | <b>Restriction site</b> |
|-------------------|---------------------------------------------------------------|-------------------------|
| KatB_Nco_Fwd      | GGACCATGGTTTTTCACAAGAAAGAACCGATTC                             | <i>NcoI</i>             |
| KatB_His_Rev      | GGGGATCCTCCAGTTAGTGATGGTGATGGTGATG<br>GGAATGTTTTTCTAGTGGGTTAG | <i>BamHI</i>            |
| KatB_NdeI_Fwd     | GGACATATGTTTTTTCACAAGAAAGAACCG                                | <i>NdeI</i>             |
| KatB_BamHI_Rev    | GGGGATCCTTAGGAATGTTTTTCTAGTGGGT                               | <i>BamHI</i>            |
| KatB_prom_Fwd     | GCGAGCTCAAAGCTGCCTTGGGGGAATTAGG                               | <i>SacI</i>             |
| KatB_prom_Rev     | GGGGTACCCTCAAAAATTAACCTCGCATCTG                               | <i>KpnI</i>             |
| pAM1956Kan_Rev    | CCGCTCGAGTCCCGCTCAGAAGAACTCGTCAAG<br>AAG                      | <i>XhoI</i>             |
| Kan_3090_Olap_Rev | CTTGCGCCCTGAGTGCTGAGGAGATGAACTAGAG                            | -                       |
| 3090_Kan_Olap_Fwd | AAACTCTAGTTCATCTCCTCAGCACTCAGGGCGC<br>AAGGGCTGCTAAAG          | -                       |
| 3090_sacI_Fwd     | GCC GAGCTCAAAAACGTGG ATCAAACAGAGG                             | <i>SacI</i>             |
| RACE_KatB_Ext     | AACGAGGGTTTGCTTCACCG                                          | -                       |
| RACE_KatB_Int     | CGTGAATCGGTTCTTCTTG                                           | -                       |
